# Supplementary material for: Arsenite as an Electron Donor for Anoxygenic Photosynthesis: Description of Three Strains of Ectothiorhodospira from Mono Lake, California and Big Soda Lake, Nevada
Source: MDPI journal article supplement (doi:10.3390/life7010001), 2016-12-26
Supplement: s1 [file s1]

# Supplementary Materials: Arsenite as an Electron Donor for Anoxygenic Photosynthesis: Description of Three Strains of *Ectothiorhodospira* from Mono Lake, California and Big Soda Lake, Nevada

Shelley Hoeft McCann, Alison Boren, Jaime Hernandez-Maldonado, Brendon Stoneburner, Chad W. Saltikov, John F. Stolz and Ronald S. Oremland

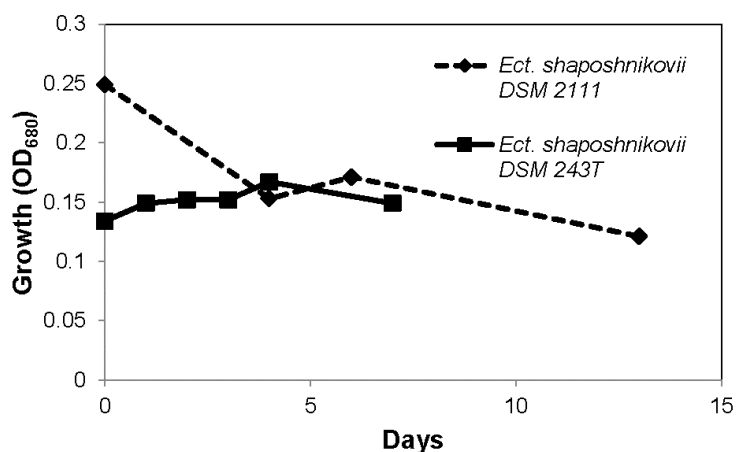

**Figure S1.** Growth data (OD<sub>680</sub>, absorbance at 680 nm) of *Ect. shaposhnikovii* (DSM 2111) (and *Ect. shaposhnikovii* (DSM 243<sup>T</sup>) when provided with 2 mM As(III) as the sole electron donor.

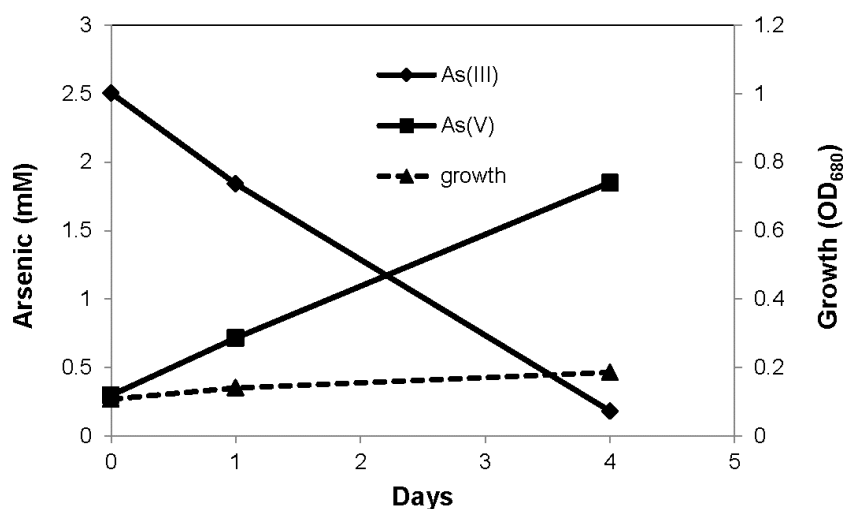

**Figure S2.** Anaerobic growth of *Halorhodospira halophila* grown phototrophically with As(III) as the sole electron donor.

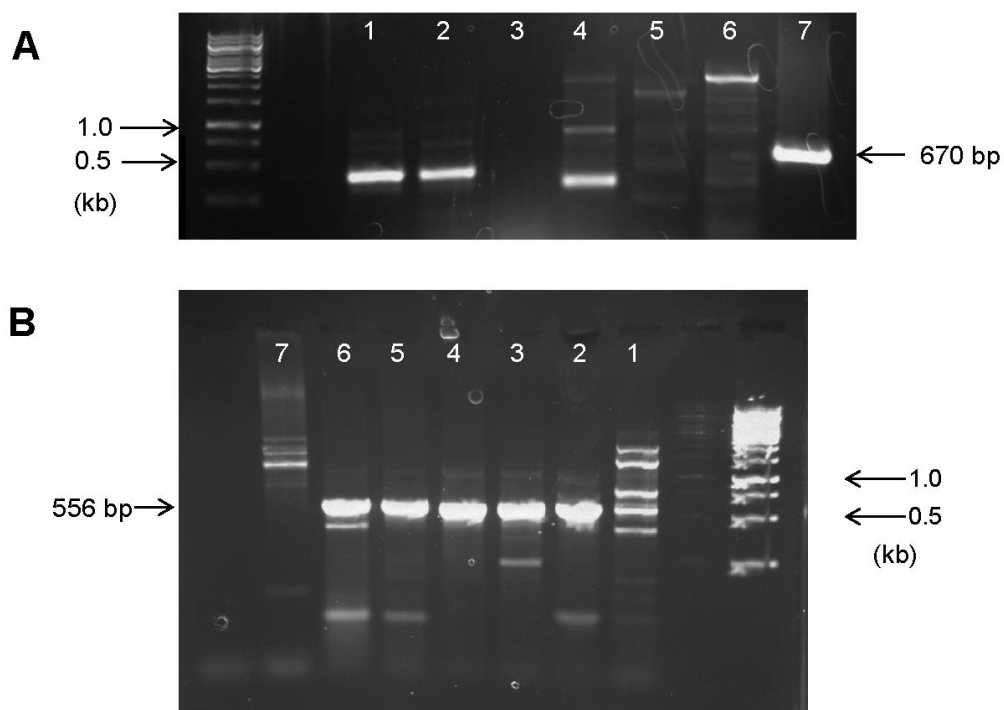

**Figure S3.** PCR analysis for (A) *aioA* (amplicon size = 670 bp) and (B) *arxA* (amplicon size 556 bp): (1) *Ect. shaposhnikovii* DSM 2111; (2) *Ect. shaposhnikovii* DSM 243<sup>T</sup>; (3) *H. halophile*; (4) PHS-1; (5) MLW-1; (6) BSL-9; and (7) *Thermus thermophiles*.
